# Supplementary material for: AFLP-based genetic mapping of the “bud-flowering” trait in heather (Calluna vulgaris)
Source: PubMed Central journal article supplement (PMC3751046; doi:10.1186/1471-2156-14-64), 2013-08-02
Supplement: 1471-2156-14-64-S4.pdf [file 1471-2156-14-64-S4.pdf]

~~Table 1: Primer combination used for generation of AFLP markers~~

| MseI/HindIII primer combinations | HhaI/HindIII primer combinations |
|----------------------------------|----------------------------------|
| MseI-AGC-HindIII-CAT             | HhaI-AC-HindIII-ACA              |
| MseI-AGC-HindIII_ACA             | HhaI-AC-HindIII-CAT              |
| MseI-CAG-HindIII-CAT             | HhaI-CA-HindIII-CAT              |
| MseI-CAG-HindIII_ACA             | HhaI-CA-HindIII-ACA              |
| MseI-TCT-HindIII-CGA             | HhaI-CT-HindIII-CAT              |
| MseI-TCT-HindIII-AGT             | HhaI-CT-HindIII-ACA              |
| MseI-TCG-HindIII-CAT             | HhaI-CAA-HindIII-ACA             |
| MseI-TCG-HindIII-ACA             | HhaI-CAA-HindIII-CAT             |
| MseI-CT_HindIII-CGA              | HhaI-CAC-HindIII-CAT             |
| MseI-CT_HindIII-AGT              | HhaI-CAC-HindIII-CAT             |
| MseI-CGA-HindIII-AGT             | HhaI-CC-HindIII-CAT              |
| MseI-CGA-HindIII-ATC             | HhaI-CC-HindIII-ACA              |
| MseI-AGT-HindIII-CGA             | HhaI-AA-HindIII-CGA              |
| MseI-AGT-HindIII-AGT             | HhaI-AC-HindIII-CGA              |
| MseI-CAC-HindIII-CA              | HhaI-CA-HindIII-AGT              |
| MseI-CAC-HindIII-AC              | HhaI-CA-HindIII-CGA              |
| MseI-CAC-HindIII-CAT             | HhaI-CA-HindIII-AGT              |
| MseI-CAC-HindIII-ACA             | HhaI-CC-HindIII-CGA              |
| MseI-GAT-HindIII-ACA             | HhaI-CC-HindIII-AGT              |
| MseI-GAT-HindIII-CAT             | HhaI-CT-HindIII-CGA              |
| MseI-TCA-HindIII-CGA             | HhaI-CT-HindIII-AGT              |
| MseI-TCA-HindIII-AGT             | HhaI-CG-HindIII-CGA              |
| MseI-CAG-HindIII-CA              | HhaI-CG-HindIII-AGT              |
| MseI-CAG-HindIII-AC              | HhaI-AA-HindIII-AAC              |
| MseI-GTA-HindIII-CAT             | HhaI-CA-HindIII-AAC              |
| MseI-GTA-HindIII-ACA             | HhaI-CA-HindIII-ACT              |
| MseI-TCC-HindIII-CAT             | HhaI-CAA-HindIII-CGA             |
| MseI-TCC-HindIII-ACA             | HhaI-CAA-HindIII-AGT             |
| MseI-CAA-HindIII-CAT             |                                  |
| MseI-TCC-HindIII-CGA             |                                  |
| MseI-TCC-HindIII-AGT             |                                  |

|                      |  |
|----------------------|--|
| MseI-TCG-HindIII-CA  |  |
| MseI-TCG-HindIII-AC  |  |
| MseI-GTG-HindIII-CGA |  |
| MseI-GTG-HindIII-AGT |  |
| MseI-TAC-HindIII-CA  |  |
| MseI-TAC-HindIII-AC  |  |
| MseI-TAC-HindIII-CGA |  |
| MseI-TAC-HindIII-AGT |  |
| MseI-AT-HindIII-CAT  |  |
| MseI-AT-HindIII-ACA  |  |
| MseI-GAC-HindIII-CAT |  |
| MseI-GAC-HindIII_ACA |  |
